# Supplementary material for: The Importance of Hypoxia-Inducible Factors (HIF-1 and HIF-2) for the Pathophysiology of Inflammatory Bowel Disease
Source: PubMed Central journal article supplement (PMC7697655; doi:10.3390/ijms21228551), 2020-11-13
Supplement: ijms-21-08551-s001.pdf [file ijms-21-08551-s001.pdf]

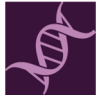

1 Supplementary Materials

2

BMDMs

3 A

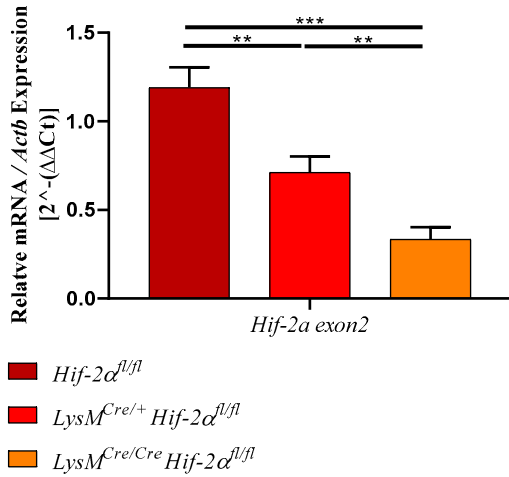

B

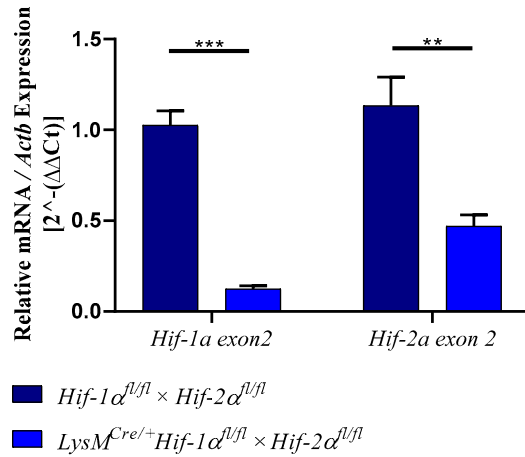

C

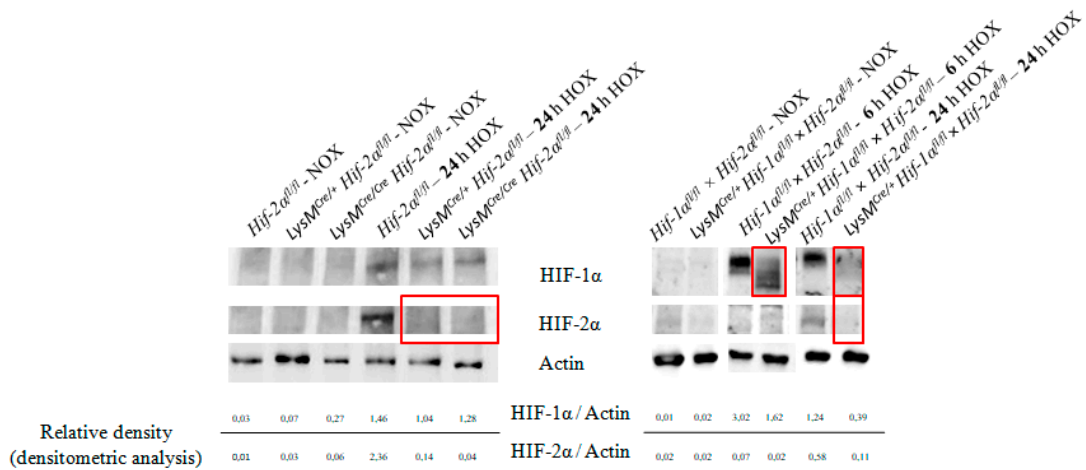

4

Neutrophils

5 D

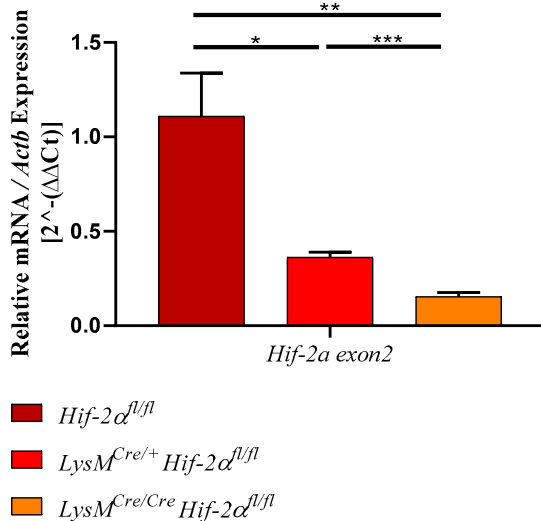

6 E

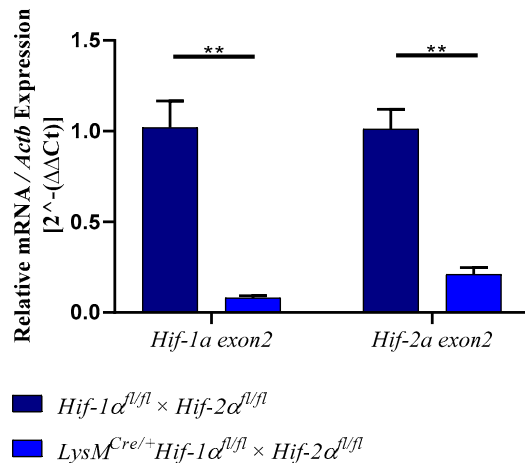

7 **Figure S1: Knockout efficiency in bone marrow-derived macrophages (BMDM) and neutrophils.** For the  
8 detection of the knockout efficiency BMDMs were cultivated for 6 h or 24 h under hypoxic conditions (HOX, 1  
9 % O<sub>2</sub>) and mRNA and protein were isolated. Knockout efficiency was determined by qPCR with primers  
10 specific for *Hif2a exon 2* (after 24 h HOX) or *Hif1a exon 2* (after 6 h HOX) (A, B). For protein analysis the BMDM  
11 treatment is indicated in (C; HOX = 1% O<sub>2</sub>). Whole cell protein lysates (50 µg per lane) have been subjected to  
12 immunoblot analysis with specific antibodies against HIF-1α and HIF-2α. Cre abundance induced a shorter  
13 protein of HIF-1α that is still detectable by the antibody (upper right part of (C)). The densitometric analysis of  
14 HIF-α bands in correlation with actin bands is given beneath each lane and revealed a lower expression of  
15 HIF-2α in both knockout strains and an additionally lower abundance of the longer form of HIF-1α in BMDMs  
16 of *LysM<sup>Cre/+</sup> Hif-1α<sup>f/f</sup> × Hif-2α<sup>f/f</sup>* mice. To detect knockout efficiency in neutrophils, mRNA was isolated after cell  
17 cultivation for 4 h with 1 mM DMOG (dimethylxalylglycine). The knockout efficiency was determined in  
18 accordance to BMDMs (D,E). Statistical analysis was performed with an unpaired t-test (mean values ± SEM;  
19 n= 3 / 4). \*:  $p < 0.05$ ; \*\*:  $p < 0.01$ ; \*\*\*:  $p < 0.001$ .  
20  
21

## 22 HIF1

## 23 A

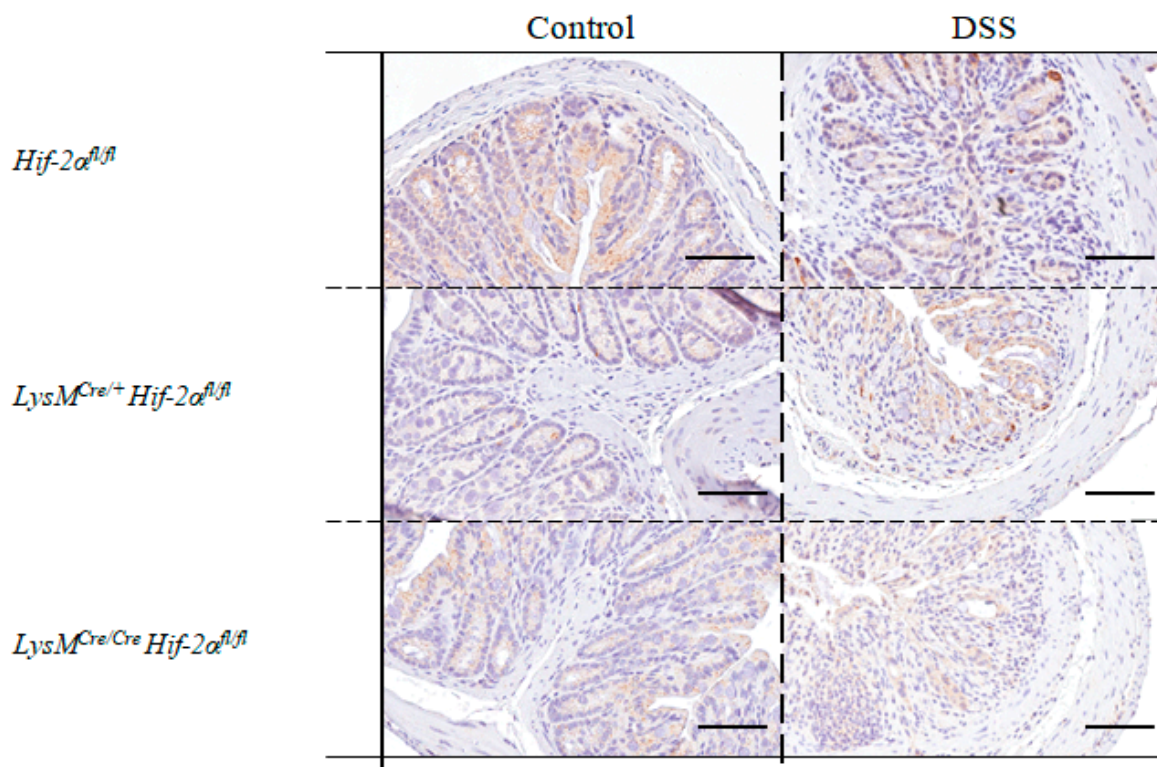

24

## 25 B

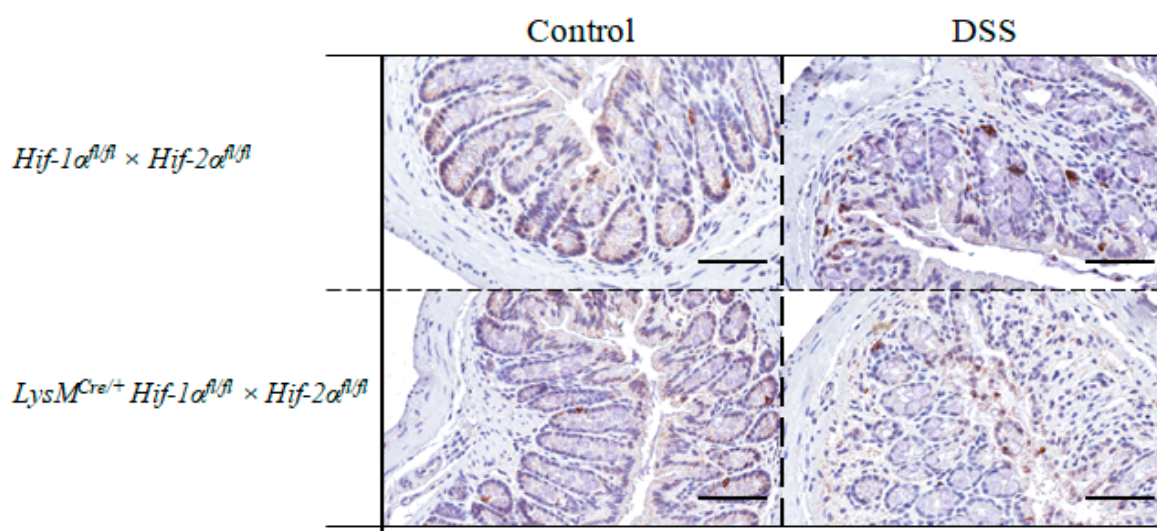

26

27

28 **Figure S2: Expression of HIF-1α is restricted to the epithelial tips in Control mice but spreads**  
 29 **towards deeper layers with increasing inflammation.** Exemplary presentation of HIF-1α-stained colon  
 30 tissue sections of (A) *Hif-2α<sup>fl/fl</sup>*, *LysM<sup>Cre/+</sup> Hif-2α<sup>fl/fl</sup>* and *LysM<sup>Cre/Cre</sup> Hif-2α<sup>fl/fl</sup>* animals, and (B) *Hif-1α<sup>fl/fl</sup> × Hif-2α<sup>fl/fl</sup>*  
 31 and *LysM<sup>Cre/+</sup> Hif-1α<sup>fl/fl</sup> × Hif-2α<sup>fl/fl</sup>* animals with and without DSS treatment. After DSS treatment, HIF-1α  
 32 expression is no longer limited to the epithelial tips but can also be found in invaded immune cells in the  
 33 *lamina propria mucosae* and *tela submucosa*. (A): *n*(Control)= 3 (*LysM<sup>Cre/Cre</sup> Hif-2α<sup>fl/fl</sup>*) / 5 (*Hif-2α<sup>fl/fl</sup>*, *LysM<sup>Cre/+</sup> Hif-*  
 34 *2α<sup>fl/fl</sup>*), *n*(DSS)= 8 (*LysM<sup>Cre/Cre</sup> Hif-2α<sup>fl/fl</sup>*) / 12 (*Hif-2α<sup>fl/fl</sup>*, *LysM<sup>Cre/+</sup> Hif-2α<sup>fl/fl</sup>*); (B): *n*(Control)=7, *n*(DSS)= 14.  
 35 (Magnification 200× and scale bar: 100 μm).

36 HIF2

37

38 A

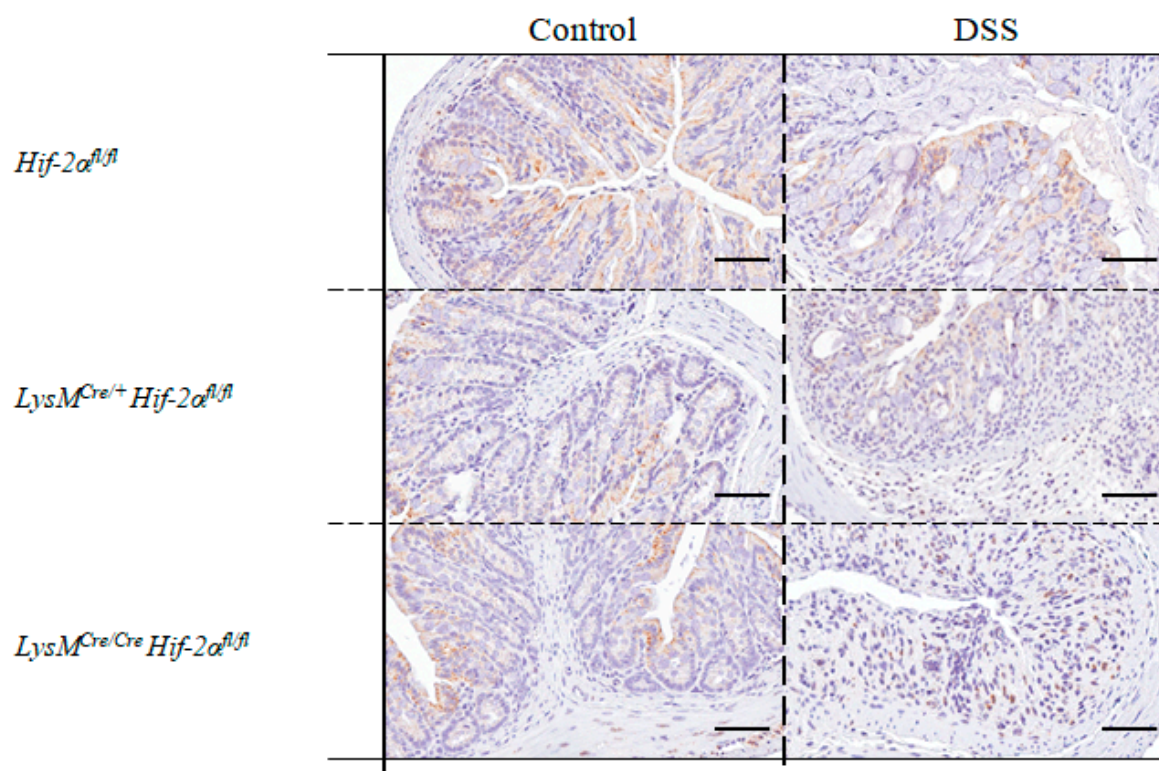

39

40

B

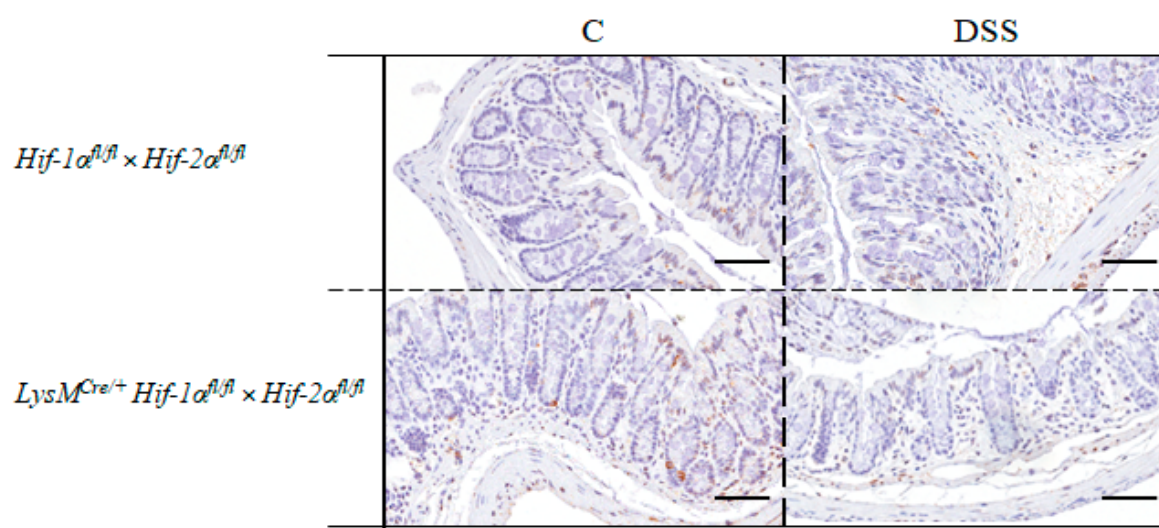

41

42 **Figure S3: Expression of HIF-2 $\alpha$  is restricted to the epithelial tips in Control mice but spreads**  
 43 **towards deeper layers with increasing inflammation.** Exemplary presentation of HIF-2 $\alpha$ -stained colon  
 44 tissue sections of (A) *Hif-2 $\alpha$ <sup>fl/fl</sup>*, *LysM<sup>Cre/+</sup> Hif-2 $\alpha$ <sup>fl/fl</sup>* and *LysM<sup>Cre/Cre</sup> Hif-2 $\alpha$ <sup>fl/fl</sup>* animals, and (B) *Hif-1 $\alpha$ <sup>fl/fl</sup> × Hif-2 $\alpha$ <sup>fl/fl</sup>*  
 45 and *LysM<sup>Cre/+</sup> Hif-1 $\alpha$ <sup>fl/fl</sup> × Hif-2 $\alpha$ <sup>fl/fl</sup>* animals with and without DSS treatment. After DSS treatment, HIF-2 $\alpha$   
 46 expression is no longer limited to the epithelial tips but can also be found in invaded immune cells in the  
 47 *lamina propria mucosae* and *tela submucosa*. (A):  $n(\text{Control})=3$  (*LysM<sup>Cre/Cre</sup> Hif-2 $\alpha$ <sup>fl/fl</sup>*) / 5 (*Hif-2 $\alpha$ <sup>fl/fl</sup>, LysM<sup>Cre/+</sup> Hif-*  
 48 *2 $\alpha$ <sup>fl/fl</sup>*),  $n(\text{DSS})=8$  (*LysM<sup>Cre/Cre</sup> Hif-2 $\alpha$ <sup>fl/fl</sup>*) / 12 (*Hif-2 $\alpha$ <sup>fl/fl</sup>, LysM<sup>Cre/+</sup> Hif-2 $\alpha$ <sup>fl/fl</sup>*); (B):  $n(\text{Control})=7$ ,  $n(\text{DSS})=14$ .  
 49 (Magnification 200 $\times$  and scale bar: 100  $\mu\text{m}$ ).



50

51 **A**

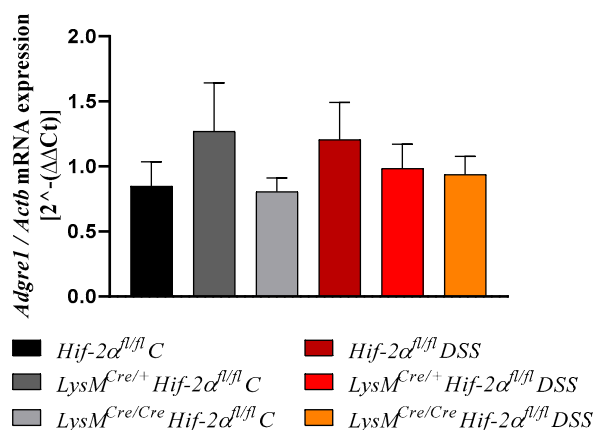

**B**

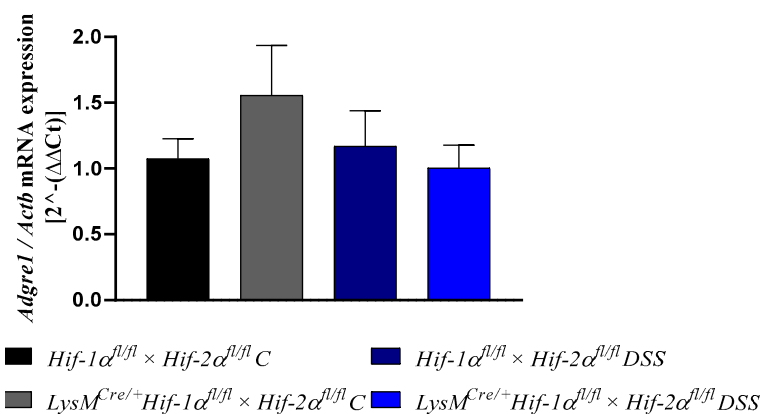

52

**D**

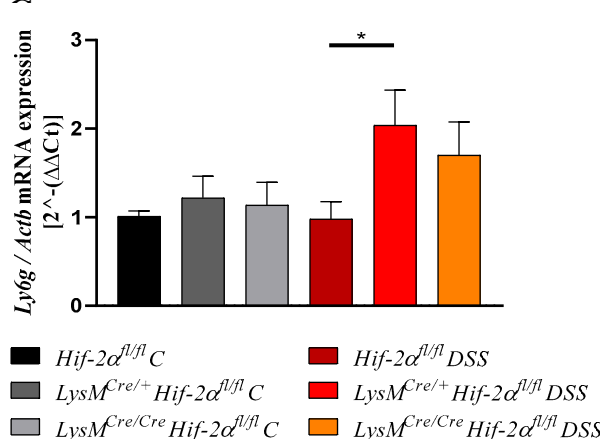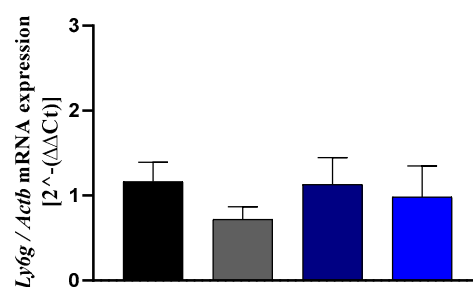

**E**

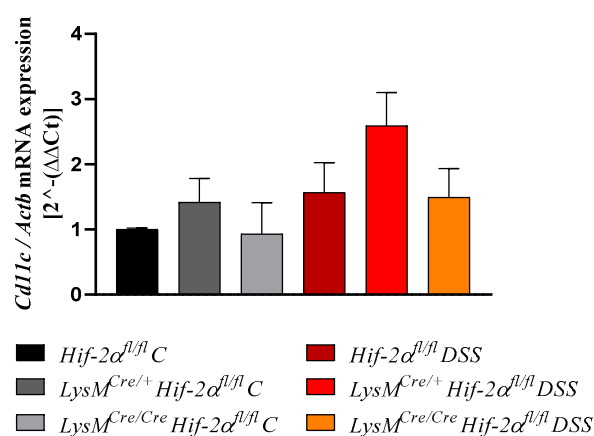

**F**

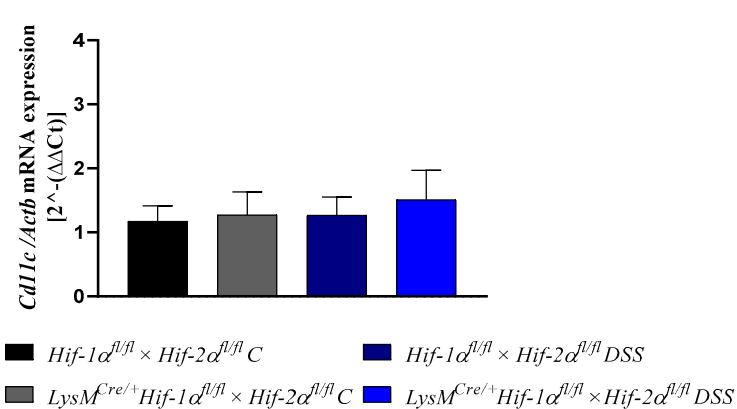

53

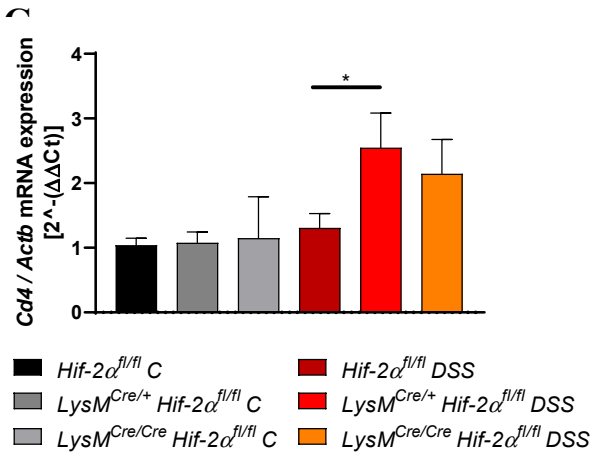

54

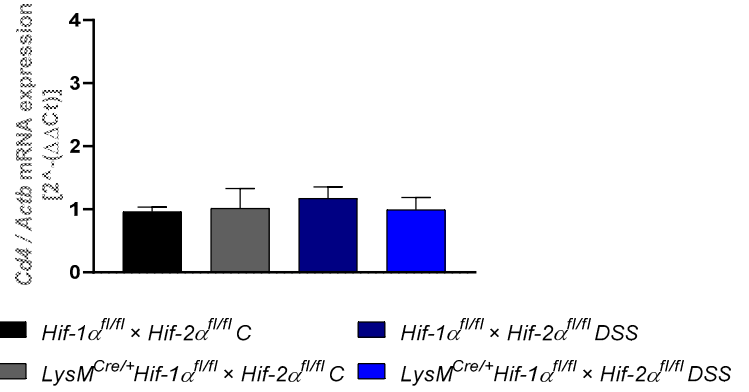

54

55

56

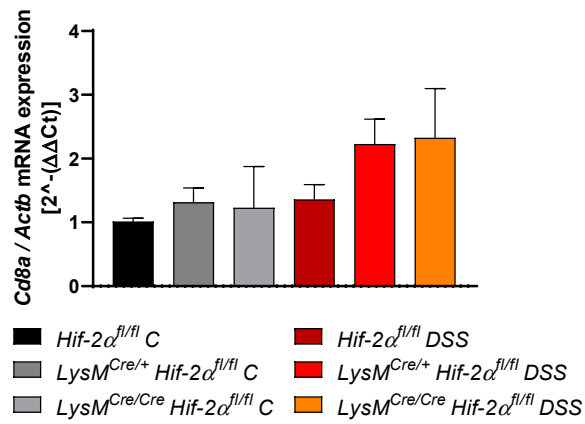

57

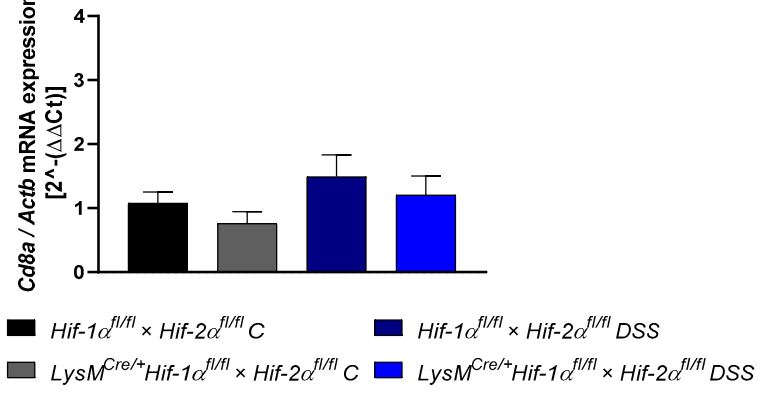

57

58

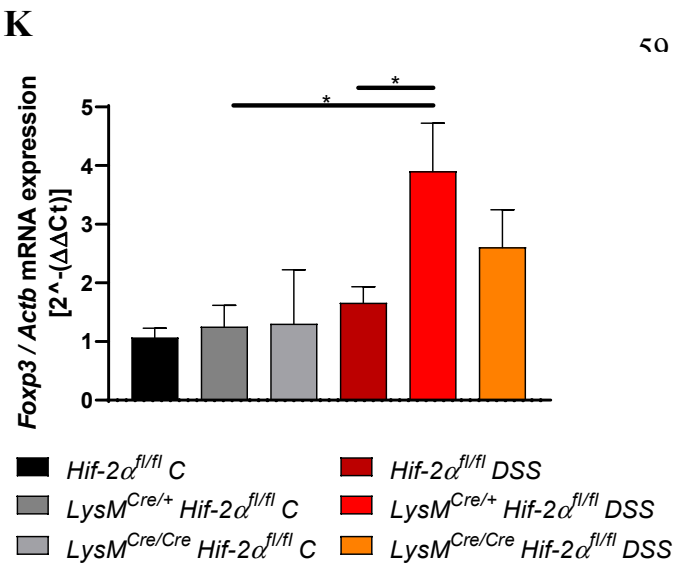

59

**Figure S4: Gene expression of immune cell markers of control animals.** Quantitative determination of the gene expression in the colon tissue of the control groups by qPCR. Statistical analysis was performed with an unpaired t-test (mean values ± SEM; n(C)= 3 (LysM<sup>Cre/Cre</sup> Hif-2α<sup>fl/fl</sup>) / 6/7 (Hif-2α<sup>fl/fl</sup>; LysM<sup>Cre/+</sup> Hif-2α<sup>fl/fl</sup>, Hif-1α<sup>fl/fl</sup> × Hif-2α<sup>fl/fl</sup>, LysM<sup>Cre/+</sup> Hif-1α<sup>fl/fl</sup> × Hif-2α<sup>fl/fl</sup>), n(DSS)= 6 (LysM<sup>Cre/Cre</sup> Hif-2α<sup>fl/fl</sup>) / 14/15 (Hif-2α<sup>fl/fl</sup>; LysM<sup>Cre/+</sup> Hif-2α<sup>fl/fl</sup>, Hif-1α<sup>fl/fl</sup> × Hif-2α<sup>fl/fl</sup>, LysM<sup>Cre/+</sup> Hif-1α<sup>fl/fl</sup> × Hif-2α<sup>fl/fl</sup>)). \*: p < 0.05.

72

73

74

75

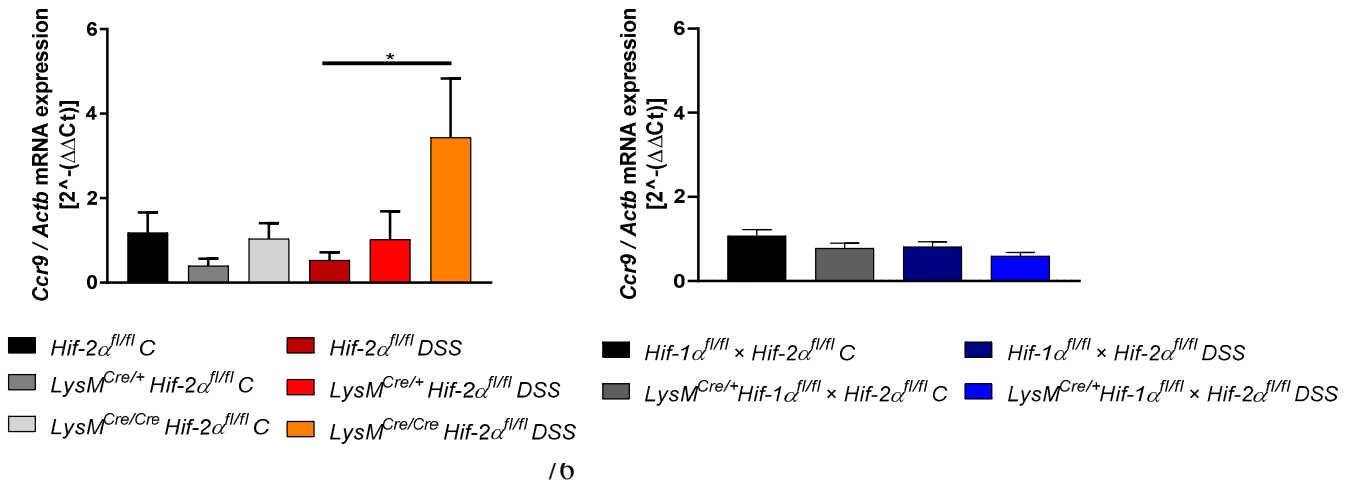

77

**Figure S5: Gene expression of *Ccr9* in lymph nodes of control animals.** Quantitative determination of the *Ccr9* expression in the colon tissue of the control groups by qPCR. Statistical analysis was performed with an unpaired t-test (mean values  $\pm$  SEM;  $n(C) = 3$  (*LysM<sup>Cre/Cre</sup> Hif-2 $\alpha^{fl/fl}$* ) / 6/7 (*Hif-2 $\alpha^{fl/fl}$* ; *LysM<sup>Cre/+</sup> Hif-2 $\alpha^{fl/fl}$* , *Hif-1 $\alpha^{fl/fl}$   $\times$  Hif-2 $\alpha^{fl/fl}$* , *LysM<sup>Cre/+</sup> Hif-1 $\alpha^{fl/fl}$   $\times$  Hif-2 $\alpha^{fl/fl}$* ),  $n(DSS) = 6$  (*LysM<sup>Cre/Cre</sup> Hif-2 $\alpha^{fl/fl}$* ) / 14/15 (*Hif-2 $\alpha^{fl/fl}$* ; *LysM<sup>Cre/+</sup> Hif-2 $\alpha^{fl/fl}$* , *Hif-1 $\alpha^{fl/fl}$   $\times$  Hif-2 $\alpha^{fl/fl}$* , *LysM<sup>Cre/+</sup> Hif-1 $\alpha^{fl/fl}$   $\times$  Hif-2 $\alpha^{fl/fl}$* )). \*:  $p < 0.05$ .

82

83

84 **A**

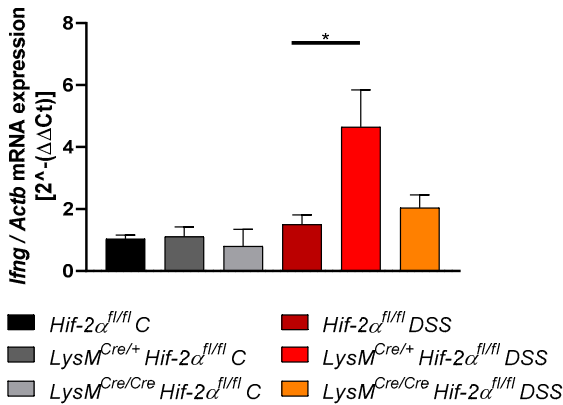

**B**

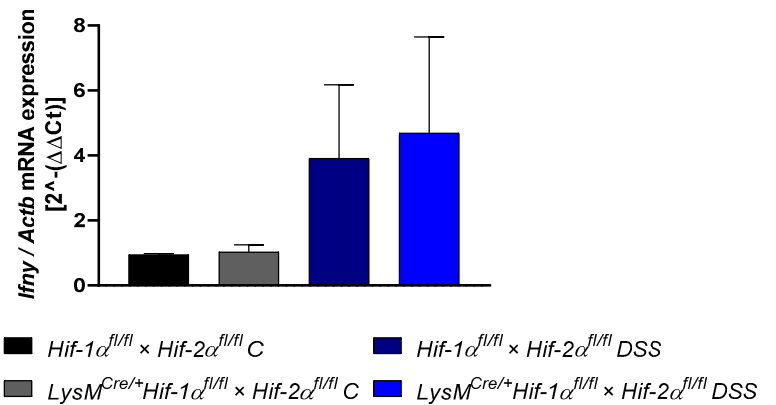

85

86

87

88 **C**

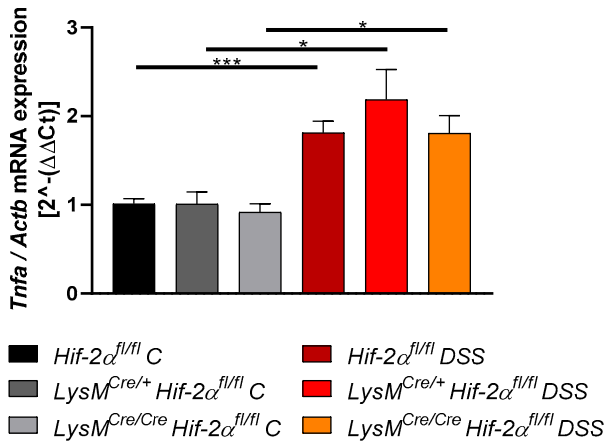

**D**

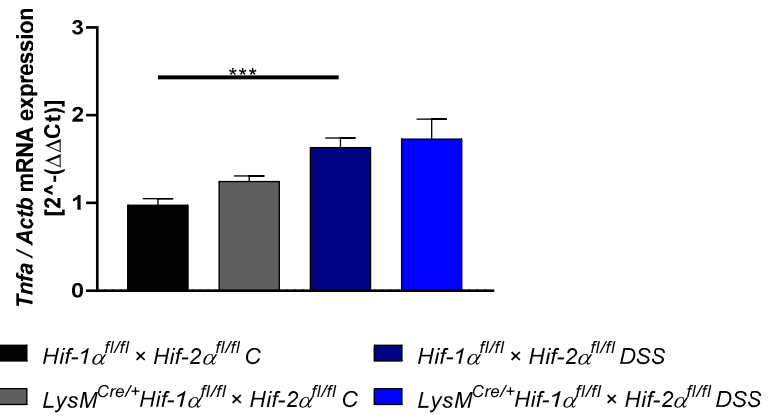

89

90

91 **E**

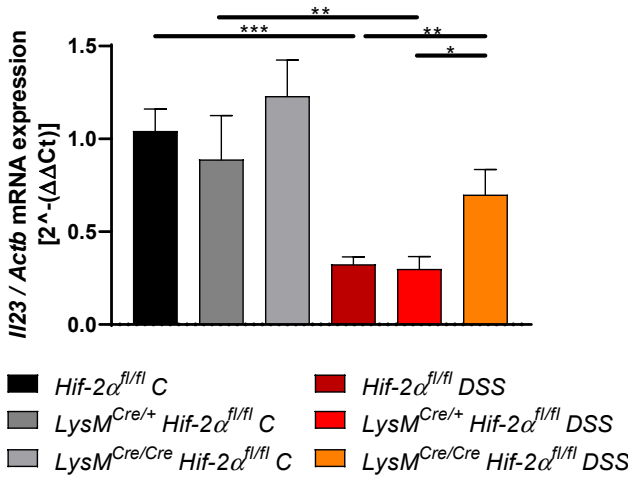

**F**

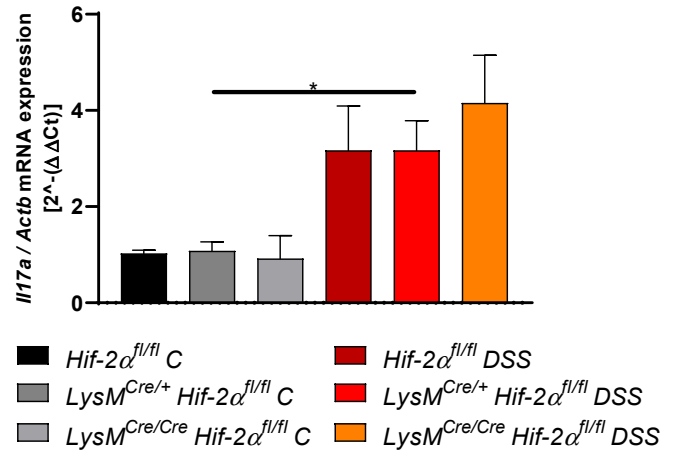

92

93 **G**

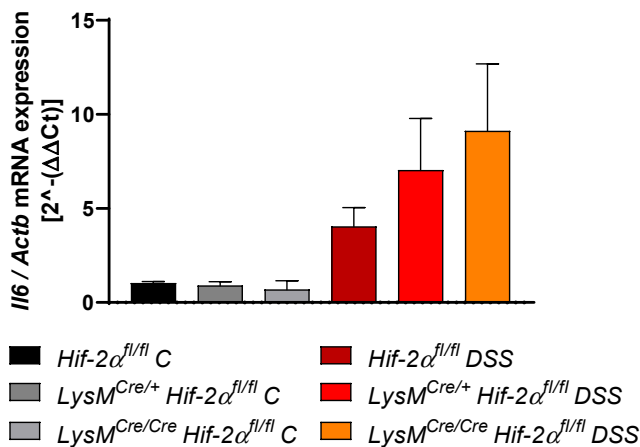

**H**

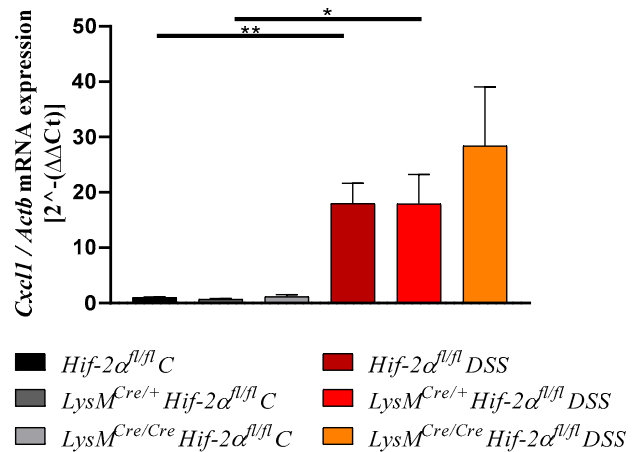



**I**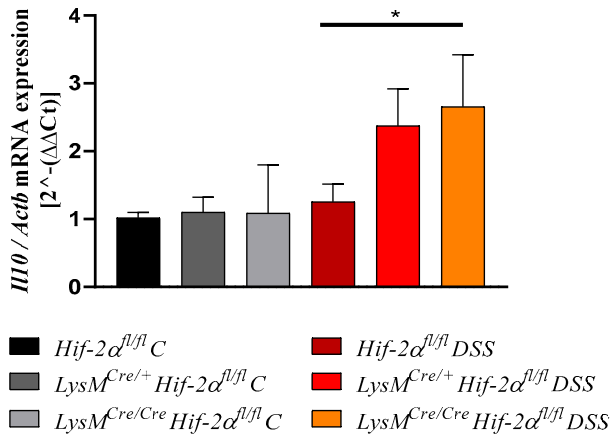**J**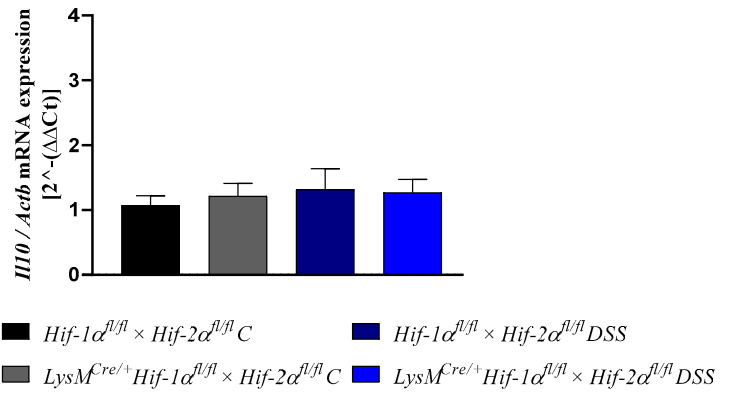**K**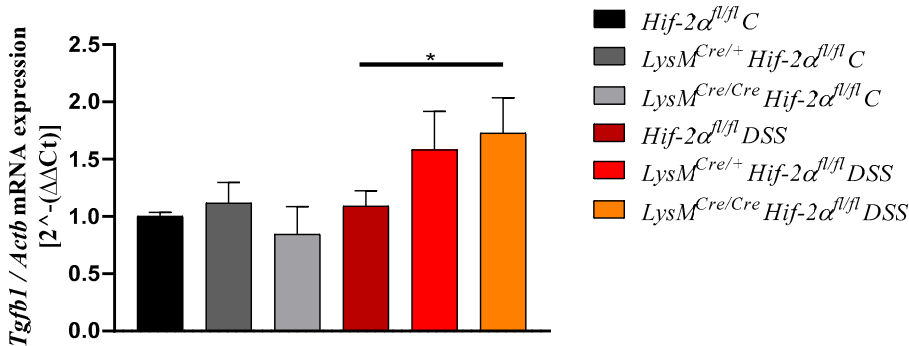**L**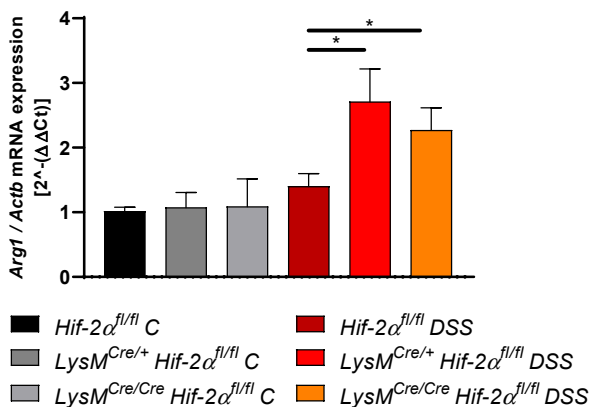**M**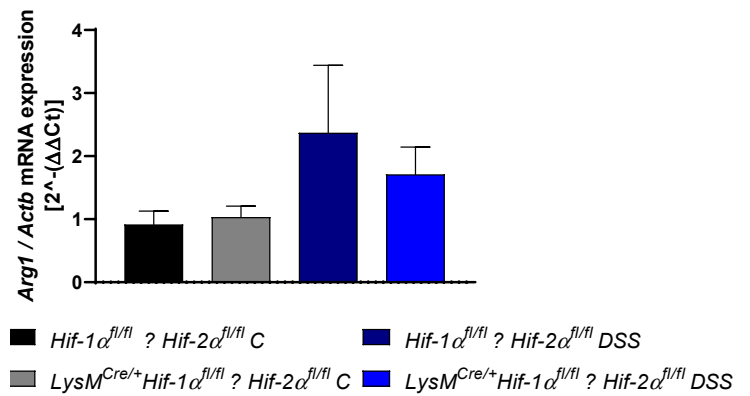

**Figure S6: Gene expression of pro- and anti-inflammatory cytokines of control animals.** Quantitative determination of the gene expression in the colon tissue of the control groups by qPCR. Statistical analysis was performed with an unpaired t-test (mean values ± SEM; n(C)= 3 (*LysM<sup>Cre/Cre</sup>* *Hif-2α<sup>fl/fl</sup>*) / 6/7 (*Hif-2α<sup>fl/fl</sup>*; *LysM<sup>Cre/+</sup>* *Hif-2α<sup>fl/fl</sup>*, *Hif-1α<sup>fl/fl</sup>* × *Hif-2α<sup>fl/fl</sup>*, *LysM<sup>Cre/+</sup>* *Hif-1α<sup>fl/fl</sup>* × *Hif-2α<sup>fl/fl</sup>*), n(DSS)= 6 (*LysM<sup>Cre/Cre</sup>* *Hif-2α<sup>fl/fl</sup>*) / 14/15 (*Hif-2α<sup>fl/fl</sup>*; *LysM<sup>Cre/+</sup>* *Hif-2α<sup>fl/fl</sup>*, *Hif-1α<sup>fl/fl</sup>* × *Hif-2α<sup>fl/fl</sup>*, *LysM<sup>Cre/+</sup>* *Hif-1α<sup>fl/fl</sup>* × *Hif-2α<sup>fl/fl</sup>*)). \*: *p* < 0.05; \*\*: *p* < 0.01; \*\*\*: *p* < 0.001.

**Table S1: Gene expression of immune cell markers of control animals.** Quantitative determination of the gene expression in the colon tissue of the control groups by qPCR (mean values  $\pm$  SEM).

| Target gene   | Animal strain                                                                                                                 | Mean value $2^{-(\Delta\Delta Ct)}$ | $\pm$ SEM | Number of animals (n) |
|---------------|-------------------------------------------------------------------------------------------------------------------------------|-------------------------------------|-----------|-----------------------|
| <i>Adgre1</i> | <i>Hif-2<math>\alpha^{\beta/\beta}</math></i>                                                                                 | 0,85                                | 0,187     | 7                     |
|               | <i>LysM<sup>Cre/+</sup> Hif-2<math>\alpha^{\beta/\beta}</math></i>                                                            | 1,27                                | 0,373     | 6                     |
|               | <i>LysM<sup>Cre/Cre</sup> Hif-2<math>\alpha^{\beta/\beta}</math></i>                                                          | 0,81                                | 0,105     | 3                     |
|               | <i>Hif-1<math>\alpha^{\beta/\beta}</math> <math>\times</math> Hif-2<math>\alpha^{\beta/\beta}</math></i>                      | 1,08                                | 0,15      | 7                     |
|               | <i>LysM<sup>Cre/+</sup> Hif-1<math>\alpha^{\beta/\beta}</math> <math>\times</math> Hif-2<math>\alpha^{\beta/\beta}</math></i> | 1,56                                | 0,38      | 7                     |
| <i>Ly6g</i>   | <i>Hif-2<math>\alpha^{\beta/\beta}</math></i>                                                                                 | 1,01                                | 0,06      | 7                     |
|               | <i>LysM<sup>Cre/+</sup> Hif-2<math>\alpha^{\beta/\beta}</math></i>                                                            | 1,22                                | 0,25      | 6                     |
|               | <i>LysM<sup>Cre/Cre</sup> Hif-2<math>\alpha^{\beta/\beta}</math></i>                                                          | 1,14                                | 0,26      | 3                     |
|               | <i>Hif-1<math>\alpha^{\beta/\beta}</math> <math>\times</math> Hif-2<math>\alpha^{\beta/\beta}</math></i>                      | 1,16                                | 0,23      | 7                     |
|               | <i>LysM<sup>Cre/+</sup> Hif-1<math>\alpha^{\beta/\beta}</math> <math>\times</math> Hif-2<math>\alpha^{\beta/\beta}</math></i> | 0,72                                | 0,15      | 7                     |
| <i>Cd11c</i>  | <i>Hif-2<math>\alpha^{\beta/\beta}</math></i>                                                                                 | 1,00                                | 0,02      | 7                     |
|               | <i>LysM<sup>Cre/+</sup> Hif-2<math>\alpha^{\beta/\beta}</math></i>                                                            | 1,42                                | 0,36      | 6                     |
|               | <i>LysM<sup>Cre/Cre</sup> Hif-2<math>\alpha^{\beta/\beta}</math></i>                                                          | 0,93                                | 0,48      | 3                     |
|               | <i>Hif-1<math>\alpha^{\beta/\beta}</math> <math>\times</math> Hif-2<math>\alpha^{\beta/\beta}</math></i>                      | 1,17                                | 0,24      | 7                     |
|               | <i>LysM<sup>Cre/+</sup> Hif-1<math>\alpha^{\beta/\beta}</math> <math>\times</math> Hif-2<math>\alpha^{\beta/\beta}</math></i> | 1,27                                | 0,36      | 7                     |
| <i>Cd4</i>    | <i>Hif-2<math>\alpha^{\beta/\beta}</math></i>                                                                                 | 1,04                                | 0,11      | 7                     |
|               | <i>LysM<sup>Cre/+</sup> Hif-2<math>\alpha^{\beta/\beta}</math></i>                                                            | 1,07                                | 0,17      | 6                     |
|               | <i>LysM<sup>Cre/Cre</sup> Hif-2<math>\alpha^{\beta/\beta}</math></i>                                                          | 1,14                                | 0,64      | 3                     |
|               | <i>Hif-1<math>\alpha^{\beta/\beta}</math> <math>\times</math> Hif-2<math>\alpha^{\beta/\beta}</math></i>                      | 0,96                                | 0,07      | 7                     |
|               | <i>LysM<sup>Cre/+</sup> Hif-1<math>\alpha^{\beta/\beta}</math> <math>\times</math> Hif-2<math>\alpha^{\beta/\beta}</math></i> | 1,02                                | 0,31      | 7                     |
| <i>Cd8a</i>   | <i>Hif-2<math>\alpha^{\beta/\beta}</math></i>                                                                                 | 1,01                                | 0,06      | 7                     |
|               | <i>LysM<sup>Cre/+</sup> Hif-2<math>\alpha^{\beta/\beta}</math></i>                                                            | 1,31                                | 0,23      | 6                     |
|               | <i>LysM<sup>Cre/Cre</sup> Hif-2<math>\alpha^{\beta/\beta}</math></i>                                                          | 1,22                                | 0,65      | 3                     |

|              |                                                                             |      |      |   |
|--------------|-----------------------------------------------------------------------------|------|------|---|
|              | <i>Hif-1α<sup>fl/fl</sup> × Hif-2α<sup>fl/fl</sup></i>                      | 1,08 | 0,17 | 7 |
|              | <i>LysM<sup>Cre/+</sup> Hif-1α<sup>fl/fl</sup> × Hif-2α<sup>fl/fl</sup></i> | 0,76 | 0,18 | 7 |
| <i>Foxp3</i> | <i>Hif-2α<sup>fl/fl</sup></i>                                               | 1,06 | 0,16 | 7 |
|              | <i>LysM<sup>Cre/+</sup> Hif-2α<sup>fl/fl</sup></i>                          | 1,25 | 0,37 | 6 |
|              | <i>LysM<sup>Cre/Cre</sup> Hif-2α<sup>fl/fl</sup></i>                        | 1,30 | 0,93 | 3 |

**Table S2: Gene expression of *Ccr9* in lymph nodes of control animals.**

Quantitative determination of the *Ccr9* expression in the colon tissue of the control groups by qPCR (mean values ± SEM).

| Target gene | Animal strain                                                               | Mean value 2 <sup>-(ΔΔCt)</sup> | ± SEM | Number of animals (n) |
|-------------|-----------------------------------------------------------------------------|---------------------------------|-------|-----------------------|
| <i>Ccr9</i> | <i>Hif-2α<sup>fl/fl</sup></i>                                               | 1,185                           | 0,48  | 3                     |
|             | <i>LysM<sup>Cre/+</sup> Hif-2α<sup>fl/fl</sup></i>                          | 0,397                           | 0,17  | 4                     |
|             | <i>LysM<sup>Cre/Cre</sup> Hif-2α<sup>fl/fl</sup></i>                        | 1,038                           | 0,37  | 3                     |
|             | <i>Hif-1α<sup>fl/fl</sup> × Hif-2α<sup>fl/fl</sup></i>                      | 1,03                            | 0,12  | 6                     |
|             | <i>LysM<sup>Cre/+</sup> Hif-1α<sup>fl/fl</sup> × Hif-2α<sup>fl/fl</sup></i> | 0,92                            | 0,11  | 5                     |

**Table S 3: Gene expression of pro- and anti-inflammatory cytokines of control animals.**

Quantitative determination of the gene expression in the colon tissue of the control groups by qPCR (mean values ± SEM).

| Target gene | Animal strain                                                               | Mean value 2 <sup>-(ΔΔCt)</sup> | ± SEM | Number of animals (n) |
|-------------|-----------------------------------------------------------------------------|---------------------------------|-------|-----------------------|
| <i>Ifnγ</i> | <i>Hif-2α<sup>fl/fl</sup></i>                                               | 1,04                            | 0,12  | 7                     |
|             | <i>LysM<sup>Cre/+</sup> Hif-2α<sup>fl/fl</sup></i>                          | 1,11                            | 0,31  | 6                     |
|             | <i>LysM<sup>Cre/Cre</sup> Hif-2α<sup>fl/fl</sup></i>                        | 0,79                            | 0,55  | 3                     |
|             | <i>Hif-1α<sup>fl/fl</sup> × Hif-2α<sup>fl/fl</sup></i>                      | 0,9                             | 0,29  | 7                     |
|             | <i>LysM<sup>Cre/+</sup> Hif-1α<sup>fl/fl</sup> × Hif-2α<sup>fl/fl</sup></i> | 0,81                            | 0,20  | 7                     |

|              |                                                                             |       |      |   |
|--------------|-----------------------------------------------------------------------------|-------|------|---|
| <i>Tnfa</i>  | <i>Hif-2α<sup>fl/fl</sup></i>                                               | 1,01  | 0,06 | 7 |
|              | <i>LysM<sup>Cre/+</sup> Hif-2α<sup>fl/fl</sup></i>                          | 1,01  | 0,14 | 6 |
|              | <i>LysM<sup>Cre/Cre</sup> Hif-2α<sup>fl/fl</sup></i>                        | 0,92  | 0,10 | 3 |
|              | <i>Hif-1α<sup>fl/fl</sup> × Hif-2α<sup>fl/fl</sup></i>                      | 0,98  | 0,07 | 7 |
|              | <i>LysM<sup>Cre/+</sup> Hif-1α<sup>fl/fl</sup> × Hif-2α<sup>fl/fl</sup></i> | 1,25  | 0,06 | 7 |
| <i>Il23a</i> | <i>Hif-2α<sup>fl/fl</sup></i>                                               | 1,04  | 0,12 | 7 |
|              | <i>LysM<sup>Cre/+</sup> Hif-2α<sup>fl/fl</sup></i>                          | 0,89  | 0,24 | 6 |
|              | <i>LysM<sup>Cre/Cre</sup> Hif-2α<sup>fl/fl</sup></i>                        | 1,23  | 0,20 | 3 |
| <i>Il17a</i> | <i>Hif-2α<sup>fl/fl</sup></i>                                               | 1,02  | 0,08 | 7 |
|              | <i>LysM<sup>Cre/+</sup> Hif-2α<sup>fl/fl</sup></i>                          | 1,07  | 0,19 | 6 |
|              | <i>LysM<sup>Cre/Cre</sup> Hif-2α<sup>fl/fl</sup></i>                        | 0,91  | 0,48 | 3 |
| <i>Il6</i>   | <i>Hif-2α<sup>fl/fl</sup></i>                                               | 1,02  | 0,10 | 7 |
|              | <i>LysM<sup>Cre/+</sup> Hif-2α<sup>fl/fl</sup></i>                          | 0,90  | 0,20 | 6 |
|              | <i>LysM<sup>Cre/Cre</sup> Hif-2α<sup>fl/fl</sup></i>                        | 0,68  | 0,47 | 3 |
| <i>Cxcl1</i> | <i>Hif-2α<sup>fl/fl</sup></i>                                               | 1,02  | 0,08 | 7 |
|              | <i>LysM<sup>Cre/+</sup> Hif-2α<sup>fl/fl</sup></i>                          | 0,70  | 0,10 | 6 |
|              | <i>LysM<sup>Cre/Cre</sup> Hif-2α<sup>fl/fl</sup></i>                        | 1,16  | 0,35 | 3 |
| <i>Il10</i>  | <i>Hif-2α<sup>fl/fl</sup></i>                                               | 1,018 | 0,08 | 7 |
|              | <i>LysM<sup>Cre/+</sup> Hif-2α<sup>fl/fl</sup></i>                          | 1,10  | 0,22 | 6 |
|              | <i>LysM<sup>Cre/Cre</sup> Hif-2α<sup>fl/fl</sup></i>                        | 1,09  | 0,71 | 3 |
|              | <i>Hif-1α<sup>fl/fl</sup> × Hif-2α<sup>fl/fl</sup></i>                      | 1,07  | 0,15 | 7 |
|              | <i>LysM<sup>Cre/+</sup> Hif-1α<sup>fl/fl</sup> × Hif-2α<sup>fl/fl</sup></i> | 1,21  | 0,20 | 7 |
| <i>Tgfb1</i> | <i>Hif-2α<sup>fl/fl</sup></i>                                               | 1,00  | 0,03 | 7 |
|              | <i>LysM<sup>Cre/+</sup> Hif-2α<sup>fl/fl</sup></i>                          | 1,12  | 0,18 | 6 |
|              | <i>LysM<sup>Cre/Cre</sup> Hif-2α<sup>fl/fl</sup></i>                        | 0,85  | 0,24 | 3 |
| <i>Arg1</i>  | <i>Hif-2α<sup>fl/fl</sup></i>                                               | 1,01  | 0,07 | 7 |
|              | <i>LysM<sup>Cre/+</sup> Hif-2α<sup>fl/fl</sup></i>                          | 1,07  | 0,23 | 6 |
|              | <i>LysM<sup>Cre/Cre</sup> Hif-2α<sup>fl/fl</sup></i>                        | 1,09  | 0,43 | 3 |
|              | <i>Hif-1α<sup>fl/fl</sup> × Hif-2α<sup>fl/fl</sup></i>                      | 0,93  | 0,19 | 7 |
|              | <i>LysM<sup>Cre/+</sup> Hif-1α<sup>fl/fl</sup> × Hif-2α<sup>fl/fl</sup></i> | 1,16  | 0,21 | 7 |
